# Supplementary material
Source: publisher site journal article supplement (https://www.degruyterbrill.com/publication/isbn/9783110305357/downloadAsset/9783110305357_Inhaltsverzeichnis.pdf)
Supplement: Supplementary file 1 [file 9783110305357_Inhaltsverzeichnis.pdf]

## Inhalt

|                                                                                                   |    |
|---------------------------------------------------------------------------------------------------|----|
| <b>A</b>                                                                                          |    |
| Das ABC der Antisemiten → Handbuch der Judenfrage                                                 |    |
| Abwehrblätter → Mitteilungen aus dem Verein zur Abwehr des Antisemitismus                         |    |
| L'Action française (Frankreich, 1899–1944) . . . . .                                              | 1  |
| Adel und Rasse → Rassenkunde des deutschen Volkes                                                 |    |
| Adversus-Judaeos-Traktate . . . . .                                                               | 3  |
| Ahasverus oder die Judenfrage (Constantin Frantz, 1844) . . . . .                                 | 5  |
| Ains Juden büchclins verlegung (Johannes Eck, 1541) . . . . .                                     | 7  |
| Ains Judenbüchleins Widerlegung → Ains Juden büchclins verlegung                                  |    |
| Die Aktion (1911–1932) . . . . .                                                                  | 9  |
| Al-Yahud wa al-Yahudiya wa al-Sihyuniya (Abd al-Wahab al-Masiri, 1999) . . . . .                  | 10 |
| Alldeutsche Blätter (1894–1939) . . . . .                                                         | 11 |
| Allgemeine Konservative → Konservative Monatsschrift                                              |    |
| Allgemeine Zeitung des Judentums (1837–1922) . . . . .                                            | 14 |
| Altermedia → Neo-Nazi Internet Blogs                                                              |    |
| Ami d'Israël → Freund Israels                                                                     |    |
| Der Angriff (1927–1945) . . . . .                                                                 | 16 |
| Anschlag gegen den Frieden (Wolfgang Diewerge, 1939) . . . . .                                    | 19 |
| Anti-Anti-Blätter (1923–1932) . . . . .                                                           | 20 |
| Der Anticlericus (Friedrich Andersen, 1907) . . . . .                                             | 21 |
| L'Antijuif (franz. Algerien, 1897–1902)                                                           | 23 |
| Antisemita (Kroatien, 1908) . . . . .                                                             | 25 |
| Antisemiten-Brevier (Wilhelm Berg, 1883) . . . . .                                                | 26 |
| Antisemiten-Catechismus → Handbuch der Judenfrage                                                 |    |
| Antisemiten-Hammer (Josef Schrattenholz/Hrsg., 1894) . . . . .                                    | 27 |
| Antisemiten-Katechismus → Handbuch der Judenfrage                                                 |    |
| L'Anti-Sémitique (Frankreich, 1883–1884) . . . . .                                                | 29 |
| Antisemitische Correspondenz → Deutschvölkische Blätter                                           |    |
| Antisemitische Hefte (Wilhelm Marr, 1880) . . . . .                                               | 30 |
| Antisemitischer Volkskalender → Kehraus-Kalender                                                  |    |
| Der Antisemitismus – Ein Internationales Interview (Hermann Bahr, 1893) . . . . .                 | 32 |
| Antisemitismus und Strafrechtspflege (Maximilian Parmod, 1894) . . . . .                          | 34 |
| Arbeiter! Schüttelt das Judenjoch ab → Flugblätter des Deutschvölkischen Schutz- und Trutz-Bundes |    |
| Arbeitertum (1931–1945) . . . . .                                                                 | 36 |
| Archiv für Rassen- und Gesellschaftsbiologie (1904–1944) . . . . .                                | 38 |
| Ares Verlag → Leopold Stocker Verlag                                                              |    |
| Aspects of Jewish Power in the US → The International Jew                                         |    |
| Auf dem Judenkirchhof in Prag (Herrmann Goedsche, 1868) . . . . .                                 | 40 |
| Auf gut deutsch (1919–1921) . . . . .                                                             | 42 |
| Das Aufgebot (Schweiz, 1933–1957) . . . . .                                                       | 42 |
| Augenspiegel (Johannes Reuchlin, 1511)                                                            | 44 |
| Aujourd'hui (Frankreich, 1940–1944) . . . . .                                                     | 45 |
| Die Aula (Österreich, seit 1952) . . . . .                                                        | 48 |
| Die Auschwitz-Lüge (Thies Christophersen, 1973) . . . . .                                         | 50 |
| Der Auschwitz-Mythos (Wilhelm Stäglich, 1979) . . . . .                                           | 53 |
| <b>B</b>                                                                                          |    |
| Baigais Gads (Lettland, 1942) . . . . .                                                           | 55 |
| Barikád (Ungarn, seit 2007) . . . . .                                                             | 57 |
| Die Bauernschaft (1969–1996) . . . . .                                                            | 58 |
| Die Bauernwürger (Max Hugo Liebermann von Sonnenberg, 1894)                                       | 60 |
| Bayreuther Blätter (1879–1938) . . . . .                                                          | 61 |
| Berliner Punsch → Der kleine Reaktionär                                                           |    |
| Berliner Revue (1855–1873) . . . . .                                                              | 64 |
| Blicke in's Talmud'sche Judentum (Konrad Martin, 1848) . . . . .                                  | 66 |

|                                                                                      |     |                                                                                                              |     |
|--------------------------------------------------------------------------------------|-----|--------------------------------------------------------------------------------------------------------------|-----|
| Blixten (Schweden, 1923–1925). . . . .                                               | 68  | Das ist der Jude! (Dietrich Eckart, 1920). . . . .                                                           | 107 |
| Der Börsen- und Gründungsschwindel in Berlin (Otto Glagau, 1874–1875; 1876). . . . . | 69  | The Dearborn Independent (USA, 1919–1927). . . . .                                                           | 108 |
| Der Bolschewismus von Moses bis Lenin (Dietrich Eckart, 1924) . . . . .              | 72  | Decretum de consociatione vulgo „Amici Israel“ abolenda<br>→ Päpstliches Aufhebungsdekret der „Amici Israel“ |     |
| Bonifacius Broschüren (1870–1910) . . .                                              | 76  | Défense de l'Occident (Frankreich, 1952–1982). . . . .                                                       | 109 |
| Bonifaciusverlag → Bonifacius-Broschüren                                             |     | Demokratisches Kampfmittel gegen ausländische Unterwanderung<br>→ HALT                                       |     |
| Botschaft Gottes (1940) . . . . .                                                    | 77  | Deutsch-Soziale Blätter (1890–1914). .                                                                       | 112 |
| Die Bremse (1872–1878) . . . . .                                                     | 79  | Deutsche Annalen → Druffel Verlag                                                                            |     |
| Die Brennessel (1931–1938). . . . .                                                  | 81  | Deutsche Antisemiten-Chronik (1894)                                                                          | 113 |
| Briefe bei Gelegenheit (Friedrich Schleiermacher, 1799) . . . . .                    | 83  | Deutsche Geschichte → Druffel Verlag                                                                         |     |
| Das Buch Isidor → „Isidor“-Bücher                                                    |     | Deutsche Geschichte im 19. Jahrhundert (Heinrich von Treitschke, 1879–1894). . . . .                         | 115 |
| Das Buch vom Kahal → Kniga kagala                                                    |     | Der Deutsche Heiland → Der Anticlericus                                                                      |     |
| Buchkameradschaft Scharnhorst<br>→ Druffel Verlag                                    |     | Deutsche Hochschullehrerzeitung<br>→ Grabert-Verlag                                                          |     |
| Bühne und Welt → Deutsches Volkstum                                                  |     | Deutsche Jahrbücher für Wissenschaft und Kunst (1841–1843) . . . . .                                         | 118 |
| <b>C</b>                                                                             |     | Die Deutsche Kämpferin (1933–1937)                                                                           | 119 |
| C.V.-Zeitung (1922–1938) . . . . .                                                   | 86  | Deutsche Kultur-Wacht → Mitteilungen des Kampfbundes für deutsche Kultur                                     |     |
| La Calle (Bolivien, 1936–1946) . . . . .                                             | 88  | Deutsche La Plata Zeitung (Argentinien, 1874–1944). . . . .                                                  | 122 |
| Le Chameau → Le Goglu                                                                |     | Deutsche mit Gott (1941) . . . . .                                                                           | 123 |
| Charlie Hebdo (Frankreich, 1970–1981 und seit 1992). . . . .                         | 89  | Deutsche Monatshefte für Politik, Geschichte und Wirtschaft → Druffel Verlag                                 |     |
| Christenschutz oder Judenhatz → Nicht Judenhatz – aber Christenschutz                |     | Deutsche Nachrichten → Das Deutsche Tageblatt                                                                |     |
| Christenschutz – nicht Judenhatz<br>→ Nicht Judenhatz – aber Christenschutz          |     | Deutsche National-Zeitung → Deutsche Soldaten- und Nationalzeitung                                           |     |
| Der Christenspiegel (Hartwig von Hundt-Radowsky, 1830). . . . .                      | 91  | Die Deutsche Polizei (1933–1945) . . .                                                                       | 125 |
| Christentum und Judentum (Walter Grundmann/Hrsg., 1940) . . . . .                    | 92  | Der Deutsche Polizeibeamte → Die Deutsche Polizei                                                            |     |
| Il Cittadino di Mantova (Italien, 1896–1919). . . . .                                | 94  | Deutsche Reichspost → Süddeutsche Zeitung                                                                    |     |
| La Civiltà Cattolica (Italien, seit 1850). .                                         | 96  | Deutsche Rundschau (1874–1964) . . .                                                                         | 127 |
| Courrier du continent (Schweiz, seit 1946). . . . .                                  | 98  | Deutsche Schriften (Paul de Lagarde, 1878). . . . .                                                          | 128 |
| Crimes da Franco-maçonaria Judaica (Paulo de Tarso, 1928) . . . . .                  | 99  | Die Deutsche Schule (1897–1943) . . .                                                                        | 130 |
| La Croix (Frankreich, seit 1880) und Le Pèlerin (Frankreich, seit 1873) . . . . .    | 101 |                                                                                                              |     |
| Cuvântul (Rumänien, 1924–1941) . . . .                                               | 103 |                                                                                                              |     |
| <b>D</b>                                                                             |     |                                                                                                              |     |
| Dansk Nationalt Tidsskrift (Dänemark, 1919–1929). . . . .                            | 105 |                                                                                                              |     |

|                                                                             |     |                                                                                   |     |
|-----------------------------------------------------------------------------|-----|-----------------------------------------------------------------------------------|-----|
| Deutsche Soldaten- und Nationalzeitung<br>(seit 1951) . . . . .             | 132 | Düsseldorfer Monathefte (1847/48–<br>1860). . . . .                               | 161 |
| Deutsche Stimme (seit 1976) . . . . .                                       | 134 | <b>E</b>                                                                          |     |
| Das Deutsche Tageblatt (1907–1929) . .                                      | 136 | EDDA → Semi-Gotha                                                                 |     |
| Deutsche Tageszeitung → Deutschöster-<br>reichische Tageszeitung            |     | Editora Revisão (Brasilien, 1987–<br>2003). . . . .                               | 163 |
| Das Deutsche Volksblatt (Österreich,<br>1889–1922). . . . .                 | 137 | Edizioni di Ar (Italien, seit 1963) . . . .                                       | 163 |
| Deutsche Wacht → Antisemitische Hefte                                       |     | Eher-Verlag (1887–1945) . . . . .                                                 | 164 |
| Deutsche Wochenzeitung → Deutsche<br>Soldaten- und Nationalzeitung          |     | Der Eidgenosse (Schweiz, 1931–1934)                                               | 166 |
| Deutsche Zeitung (1896–1934). . . . .                                       | 139 | Der Eiserne Besen (Schweiz, 1931–<br>1943). . . . .                               | 168 |
| Deutsche Zeitung im Ostland (1941–<br>1944). . . . .                        | 141 | Eiserne Blätter (1914–1939). . . . .                                              | 170 |
| Deutscher Anzeiger → Deutsche<br>Soldaten- und Nationalzeitung              |     | Eisernes Buch Deutschen Adels<br>Deutscher Art → Semi-Gotha                       |     |
| Deutsches Tagblatt → Deutschösterrei-<br>chische Tageszeitung               |     | Entdecktes Judenthum (Johann Andreas<br>Eisenmenger, 1700) . . . . .              | 171 |
| Deutsches Volkstum (1917–1941) . . . .                                      | 142 | „Entjudetes“ Gesangbuch → Botschaft<br>Gottes                                     |     |
| Deutschland in Geschichte und<br>Gegenwart (seit 1972) . . . . .            | 144 | „Entjudetes“ Neues Testament<br>→ Botschaft Gottes                                |     |
| Deutschlands Erneuerung (1917–1943)                                         | 145 | Die Entjudung des religiösen Lebens<br>(Walter Grundmann, 1939). . . . .          | 174 |
| Deutschösterreichische Tageszeitung<br>(Österreich, 1921–1933). . . . .     | 146 | Epistolae obscurorum virorum (1515–<br>1517). . . . .                             | 176 |
| Deutschvölkische Blätter (1914–1923)                                        | 148 | Ernst Schmeitzner Verlag (1874–1886)                                              | 177 |
| Deutschvölkisches Jahrbuch (1920–<br>1922). . . . .                         | 150 | Errores iudeorum → Pharetra fidei                                                 |     |
| Dialogus (Petrus Alfonsi, ca. 1110) . . .                                   | 152 | Errores Judaeorum in Thalmut (13.<br>Jahrhundert) . . . . .                       | 179 |
| Did six Million really die? (Richard E.<br>Harwood, 1974) . . . . .         | 154 | Das Erwachen der jüdischen Nation<br>(Friedrich Heman, 1897) . . . . .            | 180 |
| Diederichs-Verlag → Eugen Diederichs<br>Verlag                              |     | Der erzwungene Krieg (David L.<br>Hoggan, 1961) . . . . .                         | 182 |
| Difesa della razza (Italien, 1938–1943)                                     | 155 | Es wird Licht! → Flugblätter des<br>Deutschvölkischen Schutz- und<br>Trutz-Bundes |     |
| Dötz → Deutschösterreichische<br>Tageszeitung                               |     | Essai sur l'inégalité des races humaines<br>(Arthur de Gobineau, 1853–1855) . .   | 184 |
| Dokumente zur Judenfrage in der<br>Schweiz → Juden werden „Schweizer“       |     | Eugen Diederichs Verlag (seit 1896) . .                                           | 185 |
| Dr. Bloch's österreichische<br>Wochenschrift (1891–1920). . . . .           | 156 | Europa Verlag GmbH (1922–1953) . . .                                              | 187 |
| Dr. Bloch's Wochenschrift → Dr.<br>Bloch's österreichische<br>Wochenschrift |     | Europaprogramm der NPD → NPD-<br>Publikationen                                    |     |
| Druffel Verlag (seit 1952). . . . .                                         | 158 | Evangelium im Dritten Reich (1932–<br>1937). . . . .                              | 190 |
| Dunkelmännerbriefe → Epistolae<br>obscurorum virorum                        |     | Der ewige Jude (Hans Diebow, 1938)                                                | 192 |
| Dürer-Verlag (Argentinien, 1947–<br>1958). . . . .                          | 160 |                                                                                   |     |

## F

- Faksimile Verlag Bremen → Verlag  
Wieland Körner
- Der falsche Gott (Theodor Fritsch,  
1916). . . . . 193
- Faschism pod goluboj swesdoj  
→ Sowjetische „antizionistische“  
Publikationen
- Faschizm pod goluboj swezdoj →  
Sowjetische „antizionistische“  
Publikationen
- Le Fascist Canadien → Le Patriote
- Fatir Ziun (Mustafa Tlas, 1983) . . . . . 196
- Fi Zilal al-Qur‘an (Sayyid Qutb, 1952) 197
- Fliegende Blätter (1844–1944). . . . . 199
- Flugblätter des Deutschvölkischen  
Schutz- und Trutz-Bundes (1919–  
1922). . . . . 202
- Flugschriften im 15. und 16.  
Jahrhundert. . . . . 207
- Focal Point Publications (USA, seit  
1980). . . . . 208
- Der Föderalismus (Constantin Frantz,  
1879). . . . . 209
- Forschungen zur Judenfrage (1937–  
1944). . . . . 211
- Fortalitium fidei (Alonso de Espina, 15.  
Jahrhundert) . . . . . 212
- La France enchaînée (Frankreich, 1938–  
1939). . . . . 213
- La France Juive (Édouard Drumont,  
1886). . . . . 215
- Francs-Maçons et Juifs → Les juifs, nos  
maîtres!
- Franz Eher Nachfolger GmbH → Eher-  
Verlag
- Freie Presse → Deutsche La Plata Zeitung
- Freiheit! (Österreich, 1895–1900) . . . . 217
- Der Freund Israels (Schweiz, seit 1838) 219
- Fritt Folk (Norwegen, 1936–1945). . . . 221
- Die Front → Der Eiserne Besen
- Für die Legionäre → Pentru legionari

## G

- Gândirea (Rumänien, 1921–1944) . . . . 222
- Ganz Israel bürgt füreinander  
→ Flugblätter des Deutschvölkischen  
Schutz- und Trutz-Bundes

- Die Gartenlaube (1853–1944). . . . . 224
- Das Gebot der Stunde → Flugblätter des  
Deutschvölkischen Schutz- und  
Trutz-Bundes
- Geheimgesellschaften und ihre Macht im  
20. Jahrhundert (Jan van Helsing,  
1993). . . . . 226
- Geheimnisse der Weisen von Zion  
→ Protokolle der Weisen von Zion
- Die Geißel der Welt (Oskar Liskowsky,  
1936). . . . . 227
- Germanentum, Christentum  
→ Christentum und Judentum
- Germania (1871–1938). . . . . 229
- Die Germanomanie (Saul Ascher,  
1815). . . . . 231
- Germany must perish (Theodore N.  
Kaufman, 1941) . . . . . 234
- Das Gesetz des Nomadentums (Adolf  
Wahrmund, 1887). . . . . 235
- Die Gesundheitsführung. Ziel und Weg  
→ Ziel und Weg
- Der Giftpilz (Ernst Hiemer, 1938) . . . . 236
- Gli ebrei in Italia (Paolo Orano, 1937) 238
- Glöß-Verlag (1882–1903). . . . . 240
- Göta Lejon (Schweden, 1890–1891) . . 241
- Goethe und die Juden → Flugblätter des  
Deutschvölkischen Schutz- und  
Trutz-Bundes
- Le Goglu (Kanada, 1929–1933) . . . . . 242
- Goldene Ratten und rothe Mäuse  
→ Antisemitische Hefte
- Grabert-Verlag (seit 1974) . . . . . 244
- Großer Gott wir loben dich (1941) . . . . 245
- Gründungsmanifest der NPD → NPD-  
Publikationen
- Die Grundlagen des 19. Jahrhunderts  
(Houston Stewart Chamberlain,  
1899). . . . . 247
- Die Grundlagen des Nationalsozialismus  
(Alois Hudal, 1936) . . . . . 249
- Güterschlächterliste (1890). . . . . 251

## H

- HALT (Österreich, 1980–2006) . . . . . 253
- Hammer (1902–1940). . . . . 254
- Handbuch der Judenfrage (Theodor  
Fritsch, 1887) . . . . . 257

|                                                                                                    |                                                                                                                                             |     |
|----------------------------------------------------------------------------------------------------|---------------------------------------------------------------------------------------------------------------------------------------------|-----|
| Hanse Buchwerkstatt → Verlag Wieland<br>Körner                                                     | „Isidor“-Bücher (Joseph Goebbels, 1928<br>und 1929) . . . . .                                                                               | 290 |
| Hanseatische Verlagsanstalt (seit 1893)                                                            | Israel Triumphator! → Flugblätter des<br>Deutschvölkischen Schutz- und<br>Trutz-Bundes                                                      | 262 |
| Der Heide (1901) . . . . .                                                                         | Iudajizm bez prykras (Trofim Kitschko,<br>1963) . . . . .                                                                                   | 265 |
| Heimatverlag Leopold Stocker<br>→ Leopold Stocker Verlag                                           |                                                                                                                                             |     |
| Heimatwehr → Schweizerbanner                                                                       |                                                                                                                                             |     |
| Helm und Schild (Christian Ludwig<br>Paalzow, 1817) . . . . .                                      | <b>J</b>                                                                                                                                    | 267 |
| Hierarchie der Verschwörer → Das<br>Komitee der 300                                                | J. F. Lehmanns Verlag (1890-1979) . . .                                                                                                     | 294 |
| Die Hintermänner → Flugblätter des<br>Deutschvölkischen Schutz- und<br>Trutz-Bundes                | Das Jahr des Schreckens → Baigais Gads<br>Der Jahrhundert-Betrug (Arthur R. Butz,<br>1977) . . . . .                                        | 296 |
| Hirtenbrief über wahren und falschen<br>Nationalismus (Johannes Maria<br>Gföllner, 1933) . . . . . | J'accuse! (Émile Zola, 13. Januar<br>1898) . . . . .                                                                                        | 298 |
| Histoire du cinéma (Maurice Bardèche,<br>Robert Brasillach, 1935) . . . . .                        | Je suis partout (Frankreich, 1930–1940;<br>1941–1944) . . . . .                                                                             | 300 |
| Historisch-politische Blätter für das<br>katholische Deutschland<br>(1838–1923) . . . . .          | Jesus der Galiläer und das Judentum<br>(Walter Grundmann, 1940) . . . . .                                                                   | 303 |
| Historische Tatsachen (seit 1974) . . . .                                                          | Jesus und die Juden (Gerhard Kittel,<br>1926) . . . . .                                                                                     | 305 |
| Historische Zeitschrift (seit 1859) . . . .                                                        | Jesus und die Rabbinen (Gerhard Kittel,<br>1914) . . . . .                                                                                  | 306 |
| Hitler's War (David Irving, 1977) . . . .                                                          | Jewish Activities in the US → The<br>International Jew                                                                                      |     |
| Hitler-Rede vom 30. Januar 1939 . . . .                                                            | Jewish Influences in America → The<br>International Jew                                                                                     |     |
| The Hoax of the Twentieth Century<br>→ Der Jahrhundert-Betrug                                      | Journal of Historical Review (USA,<br>1980–1986; 1988–2002) . . . . .                                                                       | 308 |
| Der Hoheitsträger (1937–1944) . . . . .                                                            | Judas der Erz-Schelm (Abraham a<br>Sancta Clara, 1686–1695) . . . . .                                                                       | 310 |
| Hoheneichen-Verlag . . . . .                                                                       | Judas Herrschgewalt → Rathenau-Hetze<br>Judas Schuldbuch (Paul Bang, 1919) . .                                                              | 311 |
| Der Holocaust auf dem Prüfstand<br>(Jürgen Graf, 1992) . . . . .                                   | Der Jude, das Judentum und die<br>Judaisierung der christlichen Völker<br>→ Le Juif, le judaïsme et la<br>judaïsation des peuples chrétiens |     |
| Der Holocaust im Klassenzimmer<br>→ Der Holocaust auf dem Prüfstand                                | Ein Jude hat geschossen → Anschlag<br>gegen den Frieden                                                                                     |     |
| Horst-Mahler-Online → Verdener Manifest                                                            | Der Jude und der Christ → Flugblätter<br>des Deutschvölkischen Schutz- und<br>Trutz-Bundes                                                  |     |
| Hrvatski narod (Kroatien, 1939–1940)                                                               | Die Juden (Christian Ludwig Paalzow,<br>1799) . . . . .                                                                                     | 313 |
| Huy! und Pfuy! Der Welt (Abraham a<br>Sancta Clara, 1707) . . . . .                                | Die Juden, das Judentum und der<br>Zionismus → Al-Yahud wa al-<br>Yahudiya wa al-Sihyuniya                                                  |     |
| <b>I</b>                                                                                           |                                                                                                                                             |     |
| Im Deutschen Reich → C.V.-Zeitung                                                                  |                                                                                                                                             |     |
| Im Schatten des Koran → Fi Zilal<br>al-Qur'an                                                      |                                                                                                                                             |     |
| The International Jew (Henry Ford,<br>1920–1922) . . . . .                                         |                                                                                                                                             | 288 |
| A Invasão dos Judeus (Mário Saa,<br>1925) . . . . .                                                |                                                                                                                                             | 289 |

|                                                                                                                   |     |  |
|-------------------------------------------------------------------------------------------------------------------|-----|--|
| Die Juden, Könige unserer Epoche<br>→ Les Juifs, rois de l'époque                                                 |     |  |
| Die Juden – Die Könige unserer Zeit<br>(Otto Böckel, 1887) . . . . .                                              | 316 |  |
| Die Juden, unsere Herren → Les juifs,<br>nos maîtres                                                              |     |  |
| Juden hinter Stalin (Rudolf Kommoss,<br>1938) → Juden hinter Stalin (Johann<br>von Leers, 1942)                   |     |  |
| Juden hinter Stalin (Johann von Leers,<br>1942). . . . .                                                          | 318 |  |
| Die Juden im Heere (Alfred Roth,<br>1919). . . . .                                                                | 319 |  |
| Die Juden in den Kriegs-Gesellschaften<br>(Alfred Roth, 1921) . . . . .                                           | 322 |  |
| Die Juden in Österreich (Viktor<br>Reimann, 1974) . . . . .                                                       | 325 |  |
| Die Juden in USA (Hans Diebow,<br>1939). . . . .                                                                  | 326 |  |
| Juden sehen Dich an (Johann von Leers,<br>1933). . . . .                                                          | 327 |  |
| Die Juden und der deutsche Staat<br>(Naudh, 1861). . . . .                                                        | 330 |  |
| Juden und Verbrechen → Judentum und<br>Gaunertum                                                                  |     |  |
| Die Juden und das Wirtschaftsleben<br>(Werner Sombart, 1911). . . . .                                             | 332 |  |
| Juden werden „Schweizer“ (Alfred<br>Zander, 1935) . . . . .                                                       | 334 |  |
| Judenflinten → Judenflinten-Broschüre                                                                             |     |  |
| Judenflinten-Broschüre (Hermann<br>Ahlwardt, 1892) . . . . .                                                      | 336 |  |
| Die Judenfrage (Bruno Bauer, 1843) . .                                                                            | 338 |  |
| Die Judenfrage (Gerhard Kittel, 1933)                                                                             | 339 |  |
| Die Judenfrage (Ernst Dobers, 1936) . .                                                                           | 341 |  |
| Die Judenfrage (Andreas Amsee, 1939)                                                                              | 343 |  |
| Die Judenfrage als Racen-, Sitten- und<br>Culturfrage (Eugen Dühring, 1881)                                       | 345 |  |
| Die Judenfrage gegenüber dem<br>deutschen Handel und Gewerbe<br>→ Judenhetze oder Nothwehr?                       |     |  |
| Die Judenfrage im Preußischen<br>Abgeordnetenhaus (1880) . . . . .                                                | 350 |  |
| Die Judenfrage in der modernen Welt<br>(Wilhelm Ziegler, 1937). . . . .                                           | 351 |  |
| Die Judenfrage in Politik, Recht, Kultur<br>und Wirtschaft → Mitteilungen über<br>die Judenfrage                  |     |  |
| Judenhetze oder Nothwehr? (Alexander<br>Pinkert, 1880). . . . .                                                   | 353 |  |
| Der Judenkenner (1935–1936) . . . . .                                                                             | 355 |  |
| Der Judenkrieg → Sieg des Judenthums<br>über das Germanenthum                                                     |     |  |
| Die Judenmacht (1939). . . . .                                                                                    | 356 |  |
| Die Judenschule (Hartwig von Hundt-<br>Radowsky, 1822/23). . . . .                                                | 358 |  |
| Judenspiegel (Hartwig von Hundt-<br>Radowsky, 1819) . . . . .                                                     | 359 |  |
| Der Judenspiegel (Wilhelm Marr,<br>1862). . . . .                                                                 | 360 |  |
| Der Judenspiegel (E. V. von Rudolf,<br>1937). . . . .                                                             | 363 |  |
| Das Judentum (Karl Kautsky, 1890). .                                                                              | 364 |  |
| Das Judentum und der Staat (Hermann<br>Wagener/Hrsg., 1857). . . . .                                              | 365 |  |
| Das Judentum in der Musik (Richard<br>Wagner, 1850) . . . . .                                                     | 367 |  |
| Das Judentum in der Rechtswissenschaft<br>→ Judentum und Gaunertum                                                |     |  |
| Judentum und Gaunertum (Johann von<br>Leers, 1940) . . . . .                                                      | 369 |  |
| Judentum, Christentum, Germanentum<br>(Michael Kardinal von Faulhaber,<br>1934). . . . .                          | 370 |  |
| Judenviertel Europas (Hans Hinkel,<br>1939). . . . .                                                              | 372 |  |
| Os Judeus e os Protocolos dos Sábios de<br>São (Portugal) . . . . .                                               | 374 |  |
| Das Jüdel (13. Jahrhundert) . . . . .                                                                             | 375 |  |
| Jüdische Merkwürdigkeiten (Johann<br>Jacob Schudt, 1714 und 1718) . . . .                                         | 376 |  |
| Der jüdische Ritualmord (Hellmut<br>Schramm, 1943) . . . . .                                                      | 378 |  |
| Der jüdische Selbsthass (Theodor<br>Lessing, 1930) . . . . .                                                      | 378 |  |
| Die jüdische Weltpest (Hermann Esser,<br>1927). . . . .                                                           | 380 |  |
| Jüdisches und arisches Schach<br>(Alexander Aljechin, 1941) . . . . .                                             | 381 |  |
| Le Juif, le judaïsme et la judaïsation des<br>peuples chrétiens (Roger Gougenot<br>des Mousseaux, 1869) . . . . . | 383 |  |
| Les juifs, nos maîtres! (Emmanuel<br>Augustin Chabauty, 1882) . . . . .                                           | 385 |  |
| Les Juifs, rois de l'époque (Alphonse<br>Toussenel, 1845). . . . .                                                | 386 |  |

|                                                                                        |     |                                                                                                     |     |
|----------------------------------------------------------------------------------------|-----|-----------------------------------------------------------------------------------------------------|-----|
| Junge Freiheit (seit 1986) . . . . .                                                   | 387 | Kurtze Beschreibung und Erzählung von<br>einem Juden mit Namen Ahasverus<br>→ Volksbuch von Ahasver |     |
| Junge Kirche (1933–1941) . . . . .                                                     | 389 | Kurucinfo (Ungarn, seit 2005) . . . . .                                                             | 422 |
| <b>K</b>                                                                               |     | <b>L</b>                                                                                            |     |
| Kalender des Preußischen Volksvereins<br>(1863–1882) . . . . .                         | 392 | Lachen links → Der wahre Jacob                                                                      |     |
| Der Kampf gegen das Judenthum<br>(Gustav Stille, 1891) . . . . .                       | 393 | Lamed → Der Freund Israels                                                                          |     |
| Kampf gegen die Hochfinanz<br>→ Manifest zur Brechung der<br>Zinsknechtschaft          |     | Lehmanns-Verlag → J. F. Lehmanns Verlag                                                             |     |
| Kampagnet (Dänemark, 1939–1943) . .                                                    | 395 | Leopold Stocker Verlag (Österreich, seit<br>1917) . . . . .                                         | 424 |
| Katholische Rundschau → Przeglad<br>Katolicki                                          |     | Leuchter-Report (Fred A. Leuchter,<br>1988) . . . . .                                               | 425 |
| Kehraus-Kalender (1883–1890/1895)                                                      | 397 | Das Lexicon der jüdischen Geschäfts-<br>und Umgangs-Sprache (Itzig Feitel<br>Stern, 1832) . . . . . | 428 |
| Kikeriki (Österreich, 1861–1933) . . . .                                               | 398 | Lexikon der Juden in der Musik<br>(Theophil Stengel, Herbert Gerigk,<br>1940) . . . . .             | 429 |
| Die Kirche Christi und die Judenfrage<br>(1937) . . . . .                              | 400 | La Libre Parole (Frankreich, 1892–<br>1924) . . . . .                                               | 431 |
| Kladderadatsch (1848–1944) . . . . .                                                   | 403 | La Libre Parole illustré (Frankreich,<br>1893–1897) . . . . .                                       | 433 |
| Klassowaja suschtschnost sionisma<br>→ Sowjetische „antizionistische“<br>Publikationen |     | Linda Sudholt Versandbuchhandlung<br>→ Druffel Verlag                                               |     |
| Das kleine abc des Nationalsozialisten<br>(Joseph Goebbels, 1925) . . . . .            | 404 | Linzer Fliegende Blätter (Österreich,<br>1899–1914) . . . . .                                       | 434 |
| Kleine Rassenkunde des deutschen<br>Volkes → Rassenkunde des deutschen<br>Volkes       |     | Die Lösung der Judenfrage (Thomas<br>Mann, 1907) . . . . .                                          | 436 |
| Der kleine Reaktionär (1862–1867) . . .                                                | 405 | Ludendorffs Volkswarte-Verlag (seit<br>1929) . . . . .                                              | 438 |
| Klüter-Blätter → Druffel Verlag                                                        |     | Lüftl Report → Die Aula                                                                             |     |
| Kniga kagala (Jakov Brafman, 1869) . .                                                 | 407 | Luxemburger Freiheit → National-Echo                                                                |     |
| Knorke → „Isidor“-Bücher                                                               |     | Luxemburger Wort (Luxemburg, seit<br>1848) . . . . .                                                | 439 |
| Das Komitee der 300 (John Coleman,<br>1992) . . . . .                                  | 409 | <b>M</b>                                                                                            |     |
| Kompass durch die Judenfrage (Walter<br>Hoch, 1944) . . . . .                          | 412 | Das Manifest zur Brechung der<br>Zinsknechtschaft (Gottfried Feder,<br>1919) . . . . .              | 441 |
| Konservative Monatsschrift (1879–<br>1922) . . . . .                                   | 413 | Manifesto della razza (Italien, 1938) . .                                                           | 443 |
| Kräfte hinter Roosevelt (Johann von<br>Leers, 1940) . . . . .                          | 415 | Ma‘rakatuna ma‘a al-yahud (Sayyid<br>Qutb, 1950) . . . . .                                          | 444 |
| Kreuz.net (2004–2012) . . . . .                                                        | 417 | Marco Polo (Japan, 17. Januar 1995) . .                                                             | 445 |
| Kreuzzeitung (1848–1939) . . . . .                                                     | 418 | Matze von Zion → Fatir Ziun                                                                         |     |
| Kriminalität des Judentums → Judentum<br>und Gaunertum                                 |     | Der Mauscheljude (1879) . . . . .                                                                   | 448 |
| Kritik – Die Stimme des Volkes (seit<br>1971) . . . . .                                | 420 | Mecklenburger Warte → Das Deutsche<br>Tageblatt                                                     |     |
| Kroatisches Volk → Hrvatski narod                                                      |     |                                                                                                     |     |
| Der Kulturkämpfer (1880–1888) . . . .                                                  | 421 |                                                                                                     |     |

|                                                                                     |                                                                                        |
|-------------------------------------------------------------------------------------|----------------------------------------------------------------------------------------|
| Meggendorfer Blätter → Fliegende Blätter                                            | National-Zeitung → Deutsche Soldaten- und Nationalzeitung                              |
| Mein Beweis-Material gegen Jahwe<br>→ Der falsche Gott                              | Der nationale Sozialismus (Rudolf Jung, 1919)..... 477                                 |
| Mein Kampf (Adolf Hitler, 1925/26) .. 449                                           | Der Nationalliberalismus und die<br>Judenherrschaft (Constantin Frantz, 1874)..... 480 |
| Miesbacher Anzeiger (1875–1945). . . 453                                            | Nationalsozialistische Monatshefte<br>(1930–1944)..... 481                             |
| Miroir → Le Goglu                                                                   | Nationalt Tidsskrift (Norwegen, 1916–1945)..... 483                                    |
| Mit brennender Sorge (Papst Pius XI., 1937)..... 454                                | Nationen (Schweden, 1925–1941) .... 484                                                |
| Mitteilungen aus dem Verein zur<br>Abwehr des Antisemitismus (1891–1933)..... 456   | Neamul românesc (Rumänien, 1906–1940)..... 485                                         |
| Mitteilungen des Alldeutschen<br>Verbandes → Alldeutsche Blätter                    | Neo-Nazi-Blogs ..... 487                                                               |
| Mitteilungen des Kampfbundes für<br>deutsche Kultur (1929–1931)..... 457            | Neue Enthüllungen → Judenflinten-<br>Broschüre                                         |
| Mitteilungen über die Judenfrage (1937–1943)..... 460                               | Neue Freie Presse (Österreich, 1864–1939)..... 488                                     |
| Monatsschrift für das deutsche<br>Geistesleben → Deutsches Volkstum                 | Neue Preußische Zeitung → Kreuzzeitung                                                 |
| Monatsschrift für Stadt und Land<br>→ Konservative Monatsschrift                    | Das Neue Reich → Schöner Zukunft                                                       |
| Montagsblatt → Wiener Neueste<br>Nachrichten                                        | Neue Republikanische Blätter<br>→ Schweizerische Republikanische<br>Blätter            |
| Montagsfrühblatt der Wiener Neuesten<br>Nachrichten → Wiener Neueste<br>Nachrichten | Das Neue Volk (Schweiz, 1929–1965) 491                                                 |
| Moreh Zedek → Mostrador de justicia                                                 | Neuer Judenspiegel (Hartwig von<br>Hundt-Radowsky, 1828)..... 492                      |
| Moses und Jesus (Friedrich Buchholz, 1803)..... 461                                 | Neues Conversations-Lexikon → Staats-<br>und Gesellschaftslexikon                      |
| Mostrador de justicia (Alfonso von<br>Valladolid, 14. Jahrhundert)..... 462         | Neues Montagsblatt → Wiener Neueste<br>Nachrichten                                     |
| Münchener Beobachter → Völkischer<br>Beobachter                                     | Nicht Judenhatz – aber Christenschutz!<br>(1875–1893)..... 494                         |
| El Mundo (Spanien, 5. September<br>2009)..... 464                                   | Der Norden (1921–1944) ..... 496                                                       |
| Mutter, erzähl von Adolf Hitler!<br>(Johanna Haarer, 1939) ..... 466                | Der Nordische Aufseher → Der Norden                                                    |
| Der Mythos des 20. Jahrhunderts (Alfred<br>Rosenberg, 1930)..... 468                | Nordische Blätter → Der Norden                                                         |
| <b>N</b>                                                                            | Nordische Welt (1933–1937) ..... 498                                                   |
| Nasjonal Samling → Fritt Folk                                                       | Nordische Zeitung (seit 1933) ..... 499                                                |
| Die Nathanaelfrage unserer Tage (Karl<br>Schwarzmann, 1938) ..... 471               | Den nordiske race (Norwegen, 1920–1931)..... 501                                       |
| Nation Europa (seit 1951)..... 473                                                  | Nordland-Verlag (1933–1945) ..... 503                                                  |
| National-Echo (Luxemburg,<br>1936–1937)..... 475                                    | Notweg der 131er → Deutsche<br>Soldaten- und Nationalzeitung                           |
|                                                                                     | Nouvelle Revue romande (Schweiz,<br>1922–1945)..... 504                                |
|                                                                                     | NPD-Publikationen..... 505                                                             |
|                                                                                     | NS-Frauen-Warte (1932–1945) ..... 508                                                  |

**O**

- Obiectiones in Thalmut Judaeorum  
→ Errores Judaeorum in Thalmut  
Odin (1899–1901) . . . . . 510  
Öffnet die Augen ihr deutschen  
Zeitungleser → Antisemitische Hefte  
Der österreichische Volksfreund  
(Österreich, 1881–1897) . . . . . 512  
Österreichische Wochenschrift → Dr.  
Bloch's österreichische Wochenschrift  
Ordnung in der Judenfrage (1933) . . . . 513  
L'Osservatore Cattolico (Italien, 1864–  
1907) . . . . . 515  
L'Osservatore Romano (Italien, seit  
1861) . . . . . 517  
Ostara (1905–1931) . . . . . 519  
Ostdeutsche Rundschau → Deutschöster-  
reichische Tageszeitung  
Die Ostjudenfrage (Georg Fritz, 1915) 520  
Ostjüdische Zeitung (1919–1937) . . . . 523  
Ostroschno: Sionism → Sowjetische  
„antizionistische“ Publikationen  
Ostsee-Rundschau → Der Norden

**P**

- Päpstliches Aufhebungsdekret der  
„Amici Israel“ (25. März 1928) . . . . 525  
Der Panzerbär → Der Angriff  
Parole der Woche (1936–1943) . . . . . 527  
Parteiprogramm der NPD → NPD-  
Publikationen  
Le Patriote (Kanada, 1933–1938) . . . . 529  
Le Pèlerin → La Croix und Le Pèlerin  
Pentru legionari (Rumänien, 1936) . . . 530  
Le péril social → L'Anti-Sémitique  
Pharetra fidei (13.-14. Jahrhundert) . . . 531  
Der Philister vor, in und nach der  
Geschichte (Clemens Brentano,  
1811) . . . . . 534  
Philisterrede → Der Philister vor, in und  
nach der Geschichte  
Philosophische Betrachtungen über  
Theologie und Religion (Johann  
Heinrich Schulz, 1784) . . . . . 536  
Physiognomische Fragmente (Johann  
Kaspar Lavater, 1775–1778) . . . . . 537  
Le Pilori (Schweiz, 1923–1940) . . . . . 539

- Politisch-Anthropologische  
Monatsschrift → Politisch-  
Anthropologische Revue  
Politisch-Anthropologische Revue  
(1902–1922) . . . . . 540  
Politische Bilderbogen (1892–1901) . . 543  
Polsutschaja kontrrevoljuzija  
→ Sowjetische „antizionistische“  
Publikationen  
Portugal Cristão-Novo ou Os Judeus na  
República (Mário Saa, 1921) . . . . . 545  
Porunca Vremii (Rumänien,  
1932–1944) . . . . . 546  
Posener Reden (Heinrich Himmler, 4.  
und 6. Oktober 1943) . . . . . 548  
Preußische Jahrbücher (1858–1935) . . . 550  
Die Protokolle der Weisen von Zion  
(1903) . . . . . 552  
Protokolle Zions → Die Protokolle der  
Weisen von Zion  
Przegląd Katolicki (Polen, 1863–1915) 555  
Psst...! (Frankreich, 1898–1899) . . . . 556  
Pugio fidei (Ramon Martí, 13.  
Jahrhundert) . . . . . 557  
Putnik po cijelom svijetu (Kroatien,  
1907–1908) . . . . . 559

**Q**

- Die Quintessenz der Judenfrage → Der  
Reichs-Herold

**R**

- Ragnarok (Norwegen, 1935–1945) . . . 560  
Rasse (Adolf Bartels, 1909) . . . . . 562  
Rasse. Monatsschrift der Nordischen  
Bewegung (1934–1944) . . . . . 563  
Rasse und Judentum (Karl Kautsky,  
1914) . . . . . 564  
Rassebüchlein für die deutsche Jugend  
(Rudolf Wiggers, 1936) . . . . . 566  
Rassenkunde des deutschen Volkes  
(Hans F. K. Günther, 1922) . . . . . 568  
Rassenkunde des jüdischen Volkes  
(Hans F. K. Günther, 1929) . . . . . 570  
Rassenkunde Europas → Rassenkunde  
des deutschen Volkes  
Rathenau-Hetze (1922–1925) . . . . . 570

|                                                                                                    |                                                                                         |     |
|----------------------------------------------------------------------------------------------------|-----------------------------------------------------------------------------------------|-----|
| Rathenau. „Der Kandidat des Auslands“<br>→ Rathenau-Hetze                                          | Der Samstag (Schweiz, 1904–1914 und<br>1932–1934). . . . .                              | 614 |
| Recht und Wahrheit (seit 1984) . . . . .                                                           | Săptămâna roșie (Paul Goma, 2004). . .                                                  | 615 |
| Die Rechte des Christentums und des<br>deutschen Volks (Friedrich Rühs,<br>1816). . . . .          | Die Schildwache (Schweiz, 1912–<br>1965). . . . .                                       | 617 |
| Rede des Rabbiners → Auf dem<br>Judenkirchhof in Prag                                              | Schimbarea la față a României (Emil<br>Cioran, 1936) . . . . .                          | 619 |
| Reden an die deutsche Nation (Johann<br>Gottlieb Fichte, 1807–1808). . . . .                       | Schlesische Rundschau → Deutsche<br>Soldaten- und Nationalzeitung                       | 621 |
| Die Rehoboter Bastards (Eugen Fischer,<br>1913). . . . .                                           | Schlesische Volkszeitung (1871–1944)                                                    | 621 |
| Das Reich (1940–1945) . . . . .                                                                    | Schmeitzner-Verlag → Ernst<br>Schmeitzner Verlag                                        | 623 |
| Der Reichs-Herold (1887–1894). . . . .                                                             | Schmeitzners Monatszeitschrift (1882–<br>1883). . . . .                                 | 623 |
| Reichs-Sturmflagge → Deutschvölkische<br>Blätter                                                   | Schönere Zukunft (Österreich, 1925–<br>1941). . . . .                                   | 625 |
| Der Reichsbote (1873–1936) . . . . .                                                               | Schriften zur Judenfrage → Judentum<br>und Gaunertum                                    | 625 |
| Reichshallen-Rede (Ernst Henrici, 17.<br>Dezember 1880). . . . .                                   | Schulhof-CDs → NPD-Publikationen                                                        | 627 |
| Reichspost (Österreich, 1894–1938). . .                                                            | Der Schulungsbrief (1934–1944) . . . .                                                  | 627 |
| Der Reichswart (1920–1944) . . . . .                                                               | Schwarzbuch → Tschornaja Kniga                                                          | 628 |
| Das religiöse Gesicht des Judentums<br>(Walter Grundmann, Karl Friedrich<br>Euler, 1942) . . . . . | Das Schwarze Korps (1935–1945) . . . .                                                  | 628 |
| Rembrandt als Erzieher (August Julius<br>Langbehn, 1890). . . . .                                  | Schweizerbanner (Schweiz, 1925–<br>1934). . . . .                                       | 630 |
| Remer-Depesche (1991–1994) . . . . .                                                               | Schweizerdegen → Juden werden<br>„Schweizer“                                            | 632 |
| Der Republikaner → Schweizerische<br>Republikanische Blätter                                       | Schweizerische Republikanische Blätter<br>(Schweiz, 1917–1961) . . . . .                | 632 |
| Revue romande → Nouvelle Revue<br>romande                                                          | Semi-Gotha (Wilhelm von Witkenberg,<br>1912–1919). . . . .                              | 634 |
| Richter und Antisemiten (Adolf von<br>Thadden, 1959). . . . .                                      | Semi-Kürschner → Sigilla Veri                                                           | 637 |
| Rola (Polen, 1883–1912) . . . . .                                                                  | Sentinella d'Italia (Italien, seit den<br>1970er Jahren) . . . . .                      | 636 |
| Roland Versand Bremen → Verlag<br>Wieland Körner                                                   | Sfarmă Piatră (Rumänien, 1935–1942)                                                     | 636 |
| România Mare (Rumänien, seit 1990)                                                                 | Der Sieg des Judentums über das<br>Germanenthum (Wilhelm Marr,<br>1879). . . . .        | 637 |
| Die Rote Fahne (1918–1933) . . . . .                                                               | Sigilla Veri (1913). . . . .                                                            | 641 |
| Die rote Woche → Săptămâna roșie                                                                   | Signal (1940–1945). . . . .                                                             | 643 |
| Rudolf-Gutachten (Germar Rudolf,<br>1991). . . . .                                                 | Simoninis Brief (1806) . . . . .                                                        | 645 |
| Russofobia (Igor Schafarewitsch,<br>1989). . . . .                                                 | Simplicissimus (1896–1944) . . . . .                                                    | 646 |
| Russophobie → Russofobia                                                                           | Sionism na slushbe antikommunisma<br>→ Sowjetische „antizionistische“<br>Publikationen  | 648 |
| <b>S</b>                                                                                           | Sleipnir (1995–2002) . . . . .                                                          | 648 |
| Der SA-Mann (1928–1939) . . . . .                                                                  | So? oder So? – Die Wahrheit über den<br>Antisemitismus (Irene Harand,<br>1933). . . . . | 651 |
| Sămănătorul (Rumänien, 1901–1910)                                                                  |                                                                                         |     |

|                                                                                  |     |                                                                                                                         |     |
|----------------------------------------------------------------------------------|-----|-------------------------------------------------------------------------------------------------------------------------|-----|
| Social Justice (USA, 1936–1942) . . . . .                                        | 652 | Tritsch-Tratsch (Österreich, 1858–1859) . . . . .                                                                       | 694 |
| Sowjetische „antizionistische“ Publikationen (1960er bis 1980er Jahre) . . . . . | 653 | Tschornaja Kniga (Wasili Grossman, Ilja Ehrenburg, 1946) . . . . .                                                      | 695 |
| Sozialdemokratie und Antisemitismus (August Bebel, 1894) . . . . .               | 659 | Türmer-Kulturreisen → Druffel Verlag                                                                                    |     |
| SS-Leithefte (1935–1944) . . . . .                                               | 661 | Türmer-Verlag → Druffel Verlag                                                                                          |     |
| Staats- und Gesellschaftslexikon (1859–1867) . . . . .                           | 662 | Der Turmwart (Schweiz, 1946–1953) . . . . .                                                                             | 698 |
| Staatsbriefe (1990–2001) . . . . .                                               | 664 | <b>U</b>                                                                                                                |     |
| Staatsbürger-Zeitung (1865–1926) . . . . .                                       | 668 | U. Bodung-Verlag (1919–1945) . . . . .                                                                                  | 699 |
| Die Stellung des Judentums in der modernen Kultur (Karl Wick, 1921) . . . . .    | 669 | Über den Antisemitismus (Friedrich Engels, 9. Mai 1890) . . . . .                                                       | 700 |
| Stocker-Verlag → Leopold Stocker Verlag                                          |     | Ueber die Ansprüche der Juden an das deutsche Bürgerrecht (Friedrich Rühs, 1815) . . . . .                              | 701 |
| Der Stürmer (1923–1945) . . . . .                                                | 671 | Über die bürgerliche Verbesserung der Juden (Christian Wilhelm Dohm, 1781 und 1783) . . . . .                           | 703 |
| Stürmer-Archiv . . . . .                                                         | 673 | Über die Gefährdung des Wohlstands und Charakters der Deutschen durch die Juden (Jakob Friedrich Fries, 1816) . . . . . | 705 |
| Sturmblatt → Der kleine Reaktionär                                               |     | Über die Judengefahr (Johann Baptist Rusch, 1920) . . . . .                                                             | 706 |
| Sturmblatt Düppel → Der kleine Reaktionär                                        |     | Über die Kennzeichnung des Judentums (Achim von Arnim, 18. Januar 1811) . . . . .                                       | 708 |
| Süddeutsche Monatshefte (1904–1936) . . . . .                                    | 675 | Über die Religion (Friedrich Schleiermacher, 1799) . . . . .                                                            | 711 |
| Der Süddeutsche Postillon (1882–1910) . . . . .                                  | 677 | Ungeschminkter Judaismus → Iudajizm bez prykras                                                                         |     |
| Süddeutsche Reichspost → Süddeutsche Zeitung                                     |     | Unser Kampf gegen Juden → Ma'arakatuna ma'a al-yahud                                                                    |     |
| Süddeutsche Zeitung (1913–1934) . . . . .                                        | 678 | Unser Wille und Weg (1931–1941) . . . . .                                                                               | 713 |
| Südostdeutsche Tageszeitung (Rumänien, 1941–1945) . . . . .                      | 681 | Unsere Aussichten (Heinrich von Treitschke, 1879) . . . . .                                                             | 714 |
| Die Sünde wider das Blut (Artur Dinter, 1917–1934) . . . . .                     | 683 | Unsere Forderungen an das moderne Judentum (Adolf Stoecker, 19. September 1879) . . . . .                               | 717 |
| Den Svenske Arbetaren (Schweden, 1888–1892; 1894–1895) . . . . .                 | 684 | Unsere Waffen (1925–1932) . . . . .                                                                                     | 720 |
| <b>T</b>                                                                         |     | Uplands-Posten (Schweden, 1905–1907) . . . . .                                                                          | 721 |
| Tägliche Rundschau (1881–1933) . . . . .                                         | 685 | <b>V</b>                                                                                                                |     |
| Der Talmudjude (August Rohling, 1871) . . . . .                                  | 686 | O Valor da Raça (António Sardinha, 1915) . . . . .                                                                      | 722 |
| Telegramm → Schweizerbanner                                                      |     | Varpas (Litauen, 1889–1905) . . . . .                                                                                   | 723 |
| Tēviņa (Lettland, 1941–1945) . . . . .                                           | 688 | Das Vaterland (Österreich, 1859–1911) . . . . .                                                                         | 724 |
| Tėvynės sargas (Litauen, 1896–1904) . . . . .                                    | 689 |                                                                                                                         |     |
| Thatsachen zur Judenfrage → Handbuch der Judenfrage                              |     |                                                                                                                         |     |
| Todesursache Zeitgeschichtsforschung → Der Holocaust auf dem Prüfstand           |     |                                                                                                                         |     |
| Trau keinem Fuchs auf grüner Heid (Elvira Bauer, 1936) . . . . .                 | 690 |                                                                                                                         |     |
| Det tredje Ting (Lorenz Christensen, 1943) . . . . .                             | 692 |                                                                                                                         |     |
| La Tribuna Popular (Uruguay, 1879–1960) . . . . .                                | 694 |                                                                                                                         |     |

|                                                                                                                        |     |
|------------------------------------------------------------------------------------------------------------------------|-----|
| Veränderung des Antlitzes<br>→ Schimbarea la faţă                                                                      |     |
| Die Verbrechernatur der Juden<br>→ Judentum und Gaunertum                                                              |     |
| Verdener Manifest (5. Februar 2003) . . .                                                                              | 726 |
| Verlag der Freunde → Sleipnir                                                                                          |     |
| Verlag des Turmwart → Der Turmwart                                                                                     |     |
| Verlag für ganzheitliche Forschung und<br>Kultur . . . . .                                                             | 727 |
| Verlag Wieland Körner . . . . .                                                                                        | 728 |
| Verlagsgesellschaft Berg → Druffel Verlag                                                                              |     |
| Versuch über die Ungleichheit der<br>Rassen → Essai sur l'inégalité des<br>races humaines                              |     |
| Verteidigung des Abendlandes<br>→ Défense de l'Occident                                                                |     |
| Vidi (Schweden, 1913–1931) . . . . .                                                                                   | 729 |
| Vierteljahreshefte für freie<br>Geschichtsforschung (Belgien/<br>Großbritannien, 1997–2007) . . . . .                  | 730 |
| 14 Jahre Judenrepublik (Johann von<br>Leers, 1933) . . . . .                                                           | 732 |
| Die völkische Gestalt des Glaubens<br>(Walter Grundmann/Hrsg., 1943) . . .                                             | 733 |
| Völkischer Beobachter (1919–1945) . .                                                                                  | 735 |
| Volk im Werden (1933–1943) . . . . .                                                                                   | 736 |
| Volk ohne Raum (Hans Grimm, 1926)                                                                                      | 739 |
| Volk und Rasse (1926–1944) . . . . .                                                                                   | 741 |
| Volksbuch von Ahasver (1602) . . . . .                                                                                 | 742 |
| Volkswart → Der Judenkenner                                                                                            |     |
| Volkswille (Ungarn/Rumänien, 1893–<br>1933) . . . . .                                                                  | 745 |
| Von den Juden und ihren Lügen (Martin<br>Luther, 1543) . . . . .                                                       | 746 |
| Von deutscher Kunst und Literatur<br>→ Sigilla Veri                                                                    |     |
| Von Rathenau zu Barmat → Rathenau-<br>Hetze                                                                            |     |
| Vowinckel-Verlag → Druffel Verlag                                                                                      |     |
| <b>W</b>                                                                                                               |     |
| Der wahre Jacob (1877–1878; 1884–<br>1933) . . . . .                                                                   | 749 |
| Die Wahrheit (1880–1886) . . . . .                                                                                     | 752 |
| Wandzeitung des österreichischen<br>Abwehrkampfes → HALT                                                               |     |
| Die Wartburgfeier → Die Germanomanie<br>Was ist der Kern der Judenfrage? (Ernst<br>Henrici, 13. Januar 1881) . . . . . | 753 |
| Der Weg (Argentinien, 1947–1957) . . .                                                                                 | 755 |
| Weißenfesler Tageblatt (1813–1945) . .                                                                                 | 756 |
| Welt-Dienst (1933–1945) . . . . .                                                                                      | 758 |
| Die Weltfront (1926, 1935) . . . . .                                                                                   | 760 |
| Weltherrschaft des Judentums<br>→ Flugblätter des Deutschvölkischen<br>Schutz- und Trutz-Bundes                        |     |
| Der Weltkampf (1924–1944) . . . . .                                                                                    | 762 |
| Der Weltreisende → Putnik po cijelom<br>svijetu                                                                        |     |
| Wenn ich der Kaiser wär' (Heinrich<br>Claß, 1912) . . . . .                                                            | 763 |
| Wesen des Christentums (Adolf von<br>Harnack, 1899/1900) . . . . .                                                     | 766 |
| Wider die Juden (Karl Wilhelm<br>Friedrich Grattenauer, 1803) . . . . .                                                | 768 |
| Wider die Sabbather (Martin Luther,<br>1538) . . . . .                                                                 | 771 |
| Widerstand (1926–1934) . . . . .                                                                                       | 774 |
| Wiener deutsche Tageszeitung → Deut-<br>schösterreichische Tageszeitung                                                |     |
| Wiener Kirchenzeitung (Österreich,<br>1848–1874) . . . . .                                                             | 775 |
| Wiener Neueste Nachrichten<br>(Österreich, 1894–1919; 1925–<br>1945) . . . . .                                         | 776 |
| Wtorschenije bes oruschija<br>→ Sowjetische „antizionistische“<br>Publikationen                                        |     |
| Die Wucherpille (1882–1886) . . . . .                                                                                  | 778 |
| <b>Z</b>                                                                                                               |     |
| Zeitschrift für Geistes- und<br>Glaubensgeschichte → Volk im Werden                                                    |     |
| Ziel und Weg (1931–1945) . . . . .                                                                                     | 779 |
| Zionistische Protokolle → Die<br>Protokolle der Weisen von Zion                                                        |     |
| Zur Judenfrage (Karl Marx, 1843) . . . .                                                                               | 780 |
| Autorenverzeichnis . . . . .                                                                                           | 783 |
| Register der Personen . . . . .                                                                                        | 791 |
| Register der Orte und Regionen . . . . .                                                                               | 811 |
